# Supplementary material for: Effect of Y3+ on the local structure and luminescent properties of La3−xYxSi6N11:Ce3+ phosphors for high power LED lighting
Source: Royal Society of Chemistry journal article supplement (doi:10.1039/c6ra18460j), 2016-01-01
Supplement: c6ra18460j1.pdf [file c6ra18460j1.pdf]

Electronic Supplementary Material (ESI) for RSC Advances.

This journal is © The Royal Society of Chemistry 2016

**Effect of  $Y^{3+}$  on the local structure and luminescent properties of  $La_{3-x}Y_xSi_6N_{11}:Ce^{3+}$  phosphors for high power LED lighting**

*Fu Du,<sup>a</sup> Weidong Zhuang,<sup>a,\*</sup> Ronghui Liu,<sup>a,\*</sup> Yuanhong Liu,<sup>a</sup> Jiyou Zhong,<sup>a,c</sup> Wei Gao,<sup>a</sup> Kai Chen,<sup>a</sup> Lei Chen,<sup>a</sup> Kenichi Kato,<sup>b</sup> Kun Lin<sup>c</sup>*

<sup>a</sup> National Engineering Research Center for Rare Earth Materials, General Research Institute for Nonferrous Metals, and Griem Advanced Materials Co., Ltd., Beijing 100088, PR China

<sup>b</sup> RIKEN SPring-8 Center, 1-1-1 Kouto, Sayo-cho, Sayo-gun, Hyogo 679-5148, Japan

<sup>c</sup> Department of Physical Chemistry, University of Science and Technology Beijing, Beijing 100083, China

**Table S1.** Atomic coordinates and isotropic displacement parameters of  $\text{La}_{2.86-x}\text{Y}_x\text{Si}_6\text{N}_{11} \cdot 0.14\text{Ce}^{3+}$  ( $x = 0.1, 0.5, 0.9$ ) from the Rietveld Refinement of SPD.

| $\text{La}_{2.86-x}\text{Y}_x\text{Si}_6\text{N}_{11} \cdot 0.14\text{Ce}^{3+}$ ( $x = 0.1$ ) |        |        |         |              |              |
|-----------------------------------------------------------------------------------------------|--------|--------|---------|--------------|--------------|
|                                                                                               | $x$    | $y$    | $z$     | <i>Occu.</i> | <i>Biso.</i> |
| La <sub>(1)</sub>                                                                             | 0.3187 | 0.1813 | 0.6392  | 0.958        | 0.675        |
| Y <sub>(1)</sub>                                                                              | 0.3187 | 0.1813 | 0.6392  | 0.042        | 0.675        |
| La <sub>(2)</sub>                                                                             | 0      | 0      | 0.6554  | 0.984        | 0.675        |
| Y <sub>(2)</sub>                                                                              | 0      | 0      | 0.6554  | 0.016        | 0.675        |
| Si <sub>(1)</sub>                                                                             | 0.0781 | 0.2102 | 0.1229  | 1.000        | 0.418        |
| Si <sub>(2)</sub>                                                                             | 0.6176 | 0.1176 | 0.6103  | 1.000        | 0.418        |
| N <sub>(1)</sub>                                                                              | 0.0740 | 0.2288 | 0.4723  | 1.000        | 0.427        |
| N <sub>(2)</sub>                                                                              | 0.6542 | 0.1543 | 0.9622  | 1.000        | 0.427        |
| N <sub>(3)</sub>                                                                              | 0      | 0.1777 | 0.0204  | 1.000        | 0.427        |
| N <sub>(4)</sub>                                                                              | 0.5000 | 0      | 0.5771  | 1.000        | 0.427        |
| $\text{La}_{2.86-x}\text{Y}_x\text{Si}_6\text{N}_{11} \cdot 0.14\text{Ce}^{3+}$ ( $x = 0.5$ ) |        |        |         |              |              |
|                                                                                               | $x$    | $y$    | $z$     | <i>Occu.</i> | <i>Biso.</i> |
| La <sub>(1)</sub>                                                                             | 0.3187 | 0.1813 | 0.6418  | 0.886        | 0.662        |
| Y <sub>(1)</sub>                                                                              | 0.3187 | 0.1813 | 0.6418  | 0.114        | 0.662        |
| La <sub>(2)</sub>                                                                             | 0      | 0      | 0.6651  | 0.728        | 0.662        |
| Y <sub>(2)</sub>                                                                              | 0      | 0      | 0.66651 | 0.272        | 0.662        |
| Si <sub>(1)</sub>                                                                             | 0.0765 | 0.2102 | 0.1250  | 1.000        | 0.400        |
| Si <sub>(2)</sub>                                                                             | 0.6183 | 0.1183 | 0.6090  | 1.000        | 0.400        |
| N <sub>(1)</sub>                                                                              | 0.0740 | 0.2288 | 0.4723  | 1.000        | 0.400        |
| N <sub>(2)</sub>                                                                              | 0.6518 | 0.1518 | 0.9600  | 1.000        | 0.400        |
| N <sub>(3)</sub>                                                                              | 0      | 0.1764 | 0.0155  | 1.000        | 0.400        |
| N <sub>(4)</sub>                                                                              | 0.5000 | 0      | 0.5673  | 1.000        | 0.400        |

| La <sub>2.86-x</sub> Y <sub>x</sub> Si <sub>6</sub> N <sub>11</sub> :0.14Ce <sup>3+</sup> (x = 0.9) |          |          |          |              |              |
|-----------------------------------------------------------------------------------------------------|----------|----------|----------|--------------|--------------|
|                                                                                                     | <b>x</b> | <b>y</b> | <b>z</b> | <b>Occu.</b> | <b>Biso.</b> |
| La <sub>(1)</sub>                                                                                   | 0.3205   | 0.1795   | 0.6701   | 0.743        | 0.816        |
| Y <sub>(1)</sub>                                                                                    | 0.3161   | 0.1838   | 0.6819   | 0.257        | 0.816        |
| La <sub>(2)</sub>                                                                                   | 0        | 0        | 0.6911   | 0.613        | 0.816        |
| Y <sub>(2)</sub>                                                                                    | 0        | 0        | 0.6911   | 0.387        | 0.816        |
| Si <sub>(1)</sub>                                                                                   | 0.0770   | 0.2094   | 0.1513   | 1.000        | 0.400        |
| Si <sub>(2)</sub>                                                                                   | 0.6179   | 0.1179   | 0.6387   | 1.000        | 0.400        |
| N <sub>(1)</sub>                                                                                    | 0.0770   | 0.2319   | 0.5085   | 1.000        | 0.400        |
| N <sub>(2)</sub>                                                                                    | 0.6554   | 0.1554   | 0.9926   | 1.000        | 0.400        |
| N <sub>(3)</sub>                                                                                    | 0        | 0.1759   | 0.0466   | 1.000        | 0.400        |
| N <sub>(4)</sub>                                                                                    | 0.5000   | 0        | 0.6077   | 1.000        | 0.400        |

**Table S2.** Crystallographic Data after Refinements of La<sub>2.86-x</sub>Y<sub>x</sub>Si<sub>6</sub>N<sub>11</sub>:0.14Ce<sup>3+</sup> (x = 0, 0.1, 0.3, 0.5, 0.7, 0.9)

| <b>x</b>   | <b>a (Å)</b> | <b>c (Å)</b> | <b>V<sub>La(1)/Y(1)</sub> (Å<sup>3</sup>)</b> | <b>V<sub>La(2)/Y(2)</sub> (Å<sup>3</sup>)</b> | <b>Bond La<sub>(2)</sub>-N (Å)</b> |
|------------|--------------|--------------|-----------------------------------------------|-----------------------------------------------|------------------------------------|
| <b>0</b>   | 10.1885      | 4.840        | 28.2793                                       | 29.8939                                       | 2.6362                             |
| <b>0.1</b> | 10.1793      | 4.841        | 28.1770                                       | 29.6197                                       | 2.6280                             |
| <b>0.3</b> | 10.1573      | 4.840        | 27.8490                                       | 29.2873                                       | 2.6146                             |
| <b>0.5</b> | 10.137       | 4.847        | 27.5418                                       | 28.9138                                       | 2.5987                             |
| <b>0.7</b> | 10.1231      | 4.841        | 27.2333                                       | 28.1523                                       | 2.5926                             |
| <b>0.9</b> | 10.1143      | 4.842        | 27.1696                                       | 27.6786                                       | 2.5892                             |

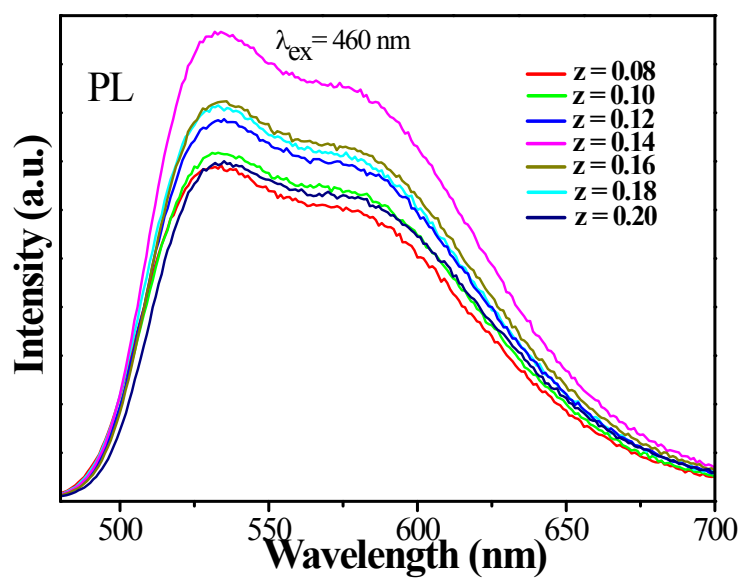

**Figure S1.** PL spectra of  $\text{La}_{3-z}\text{Si}_6\text{N}_{11}:z\text{Ce}^{3+}$  with varying  $\text{Ce}^{3+}$  concentrations ( $z = 0.08, 0.10, 0.12, 0.14, 0.16, 0.18, 0.20$ )

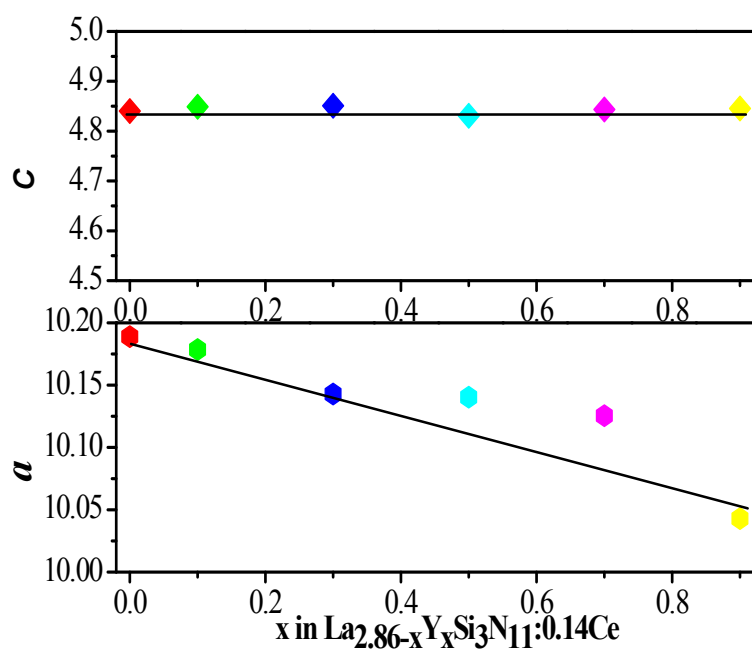

**Figure S2.** The cell parameters  $a$  and  $c$  of  $\text{La}_{2.86-x}\text{Y}_x\text{Si}_6\text{N}_{11}:0.14\text{Ce}^{3+}$ .

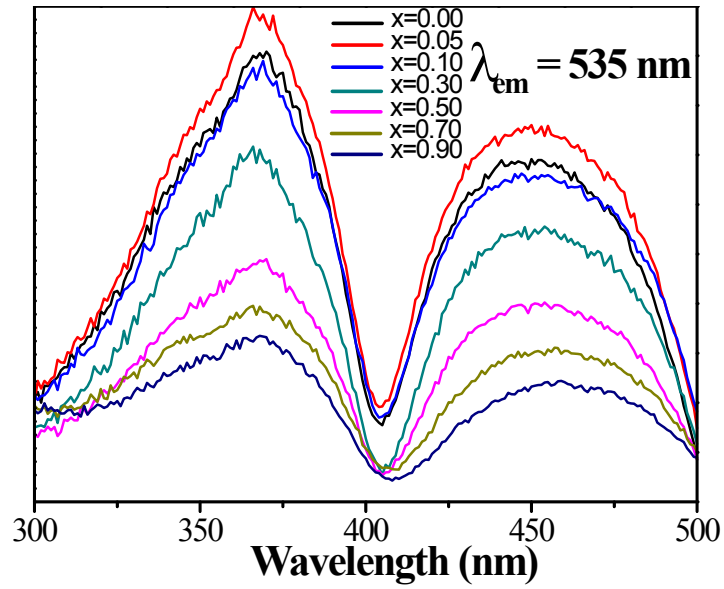

**Figure S3.** Excitation spectra of  $\text{La}_{2.86-x}\text{Y}_x\text{Si}_6\text{N}_{11}:0.14\text{Ce}^{3+}$  ( $x = 0, 0.05, 0.1, 0.3, 0.5, 0.7, 0.9$ ).

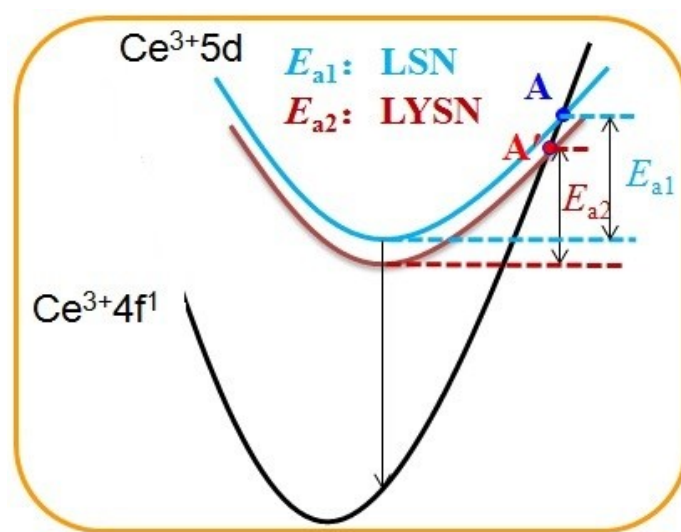

**Figure S4.** The configurational coordinate of the ground state of  $\text{Ce}^{3+}$  and the excited states of  $\text{Ce}^{3+}$  in LSN and LYSN phosphors.
